# Supplementary material for: Development of strategies for genetic manipulation and fine‐tuning of a chloroplast retrograde signal 3′‐phosphoadenosine 5′‐phosphate
Source: PubMed Central journal article supplement (PMC6508504; doi:10.1002/pld3.31), 2018-01-09
Supplement: PLD3-2-e00031-s002.pdf [file PLD3-2-e00031-s002.pdf]

Reviewer Comments:

Reviewer #2:

Comments to the Author (Required):

The authors have addressed most of my previous comments. I would have preferred to have seen SAL1 transcript levels for the different transgenic lines produced, but the reference provided at least provides prior art of similar phenomena.

Reviewer #3:

Comments to the Author (Required):

In this study, the authors presented a precise regulation of PAP accumulation in chloroplast that balances stress tolerance and plant growth. I have read its previous version and comments from both reviewers, and also authors' response and revised manuscript. It seems all concerns have been well addressed. I don't have additional comments, and would recommend this manuscript to be accepted for publication.
